# Supplementary material
Source: PubMed Central journal article supplement (PMC8259732)
Supplement: NIHMS1711802-supplement-SUPPLEMENTAL_FIGURES.pdf [file NIHMS1711802-supplement-SUPPLEMENTAL_FIGURES.pdf]

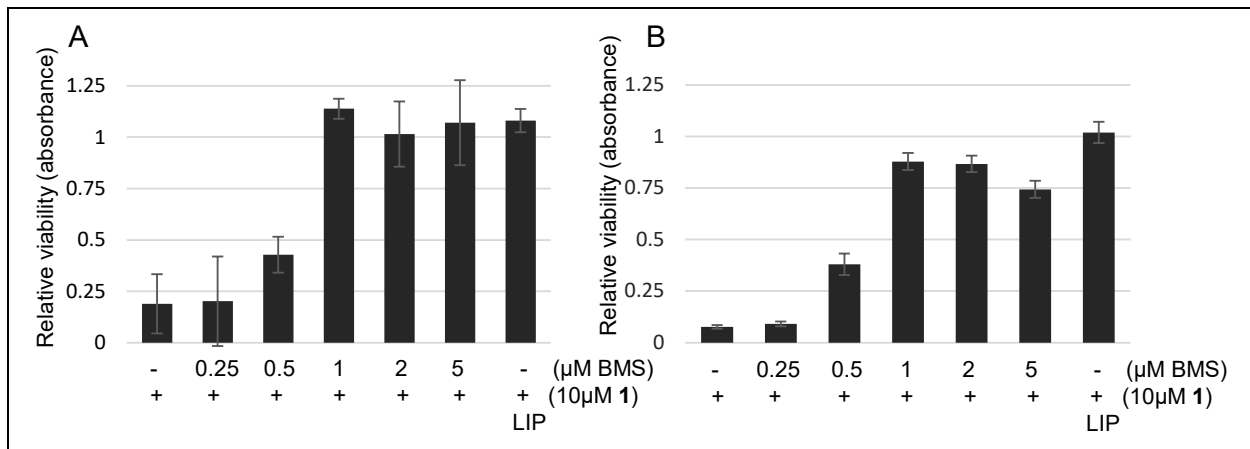

Supplemental Figure 1. Comparison of methylene blue and MTT assay. NCI-H522 cells were plated and next day treated with the compounds as indicated. 24hr later, viability was determined by MTT assay (Goldbio) according to manufacturer's instructions (A) or methylene blue (B).

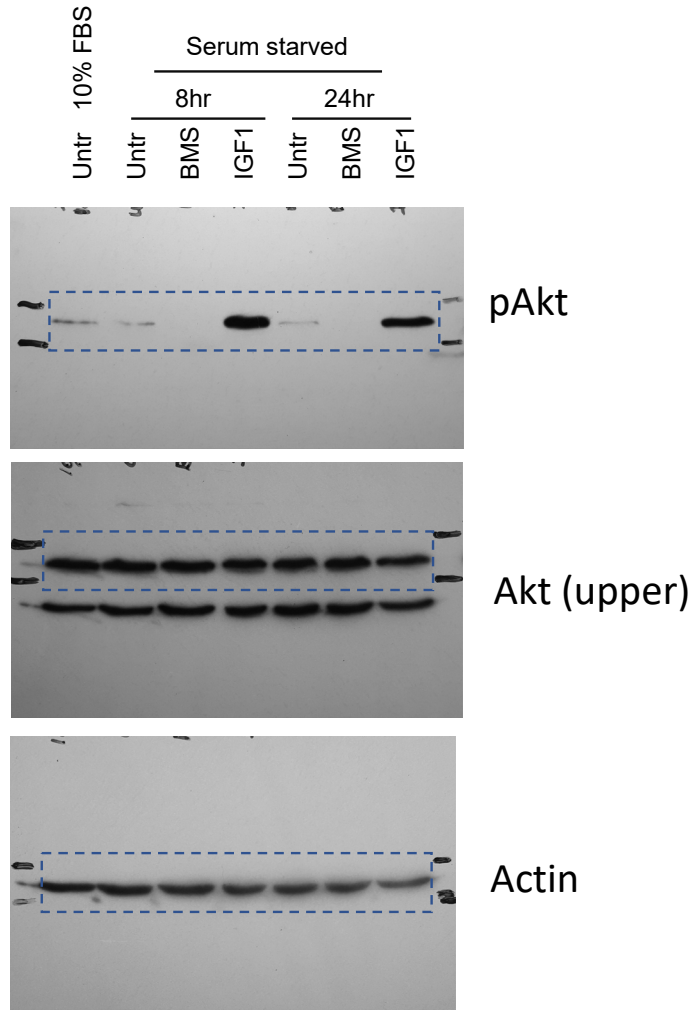

Supplemental Figure 2. Uncropped experiment to accompany figure 4D. Experimental details are as described in the legend to figure 4D.

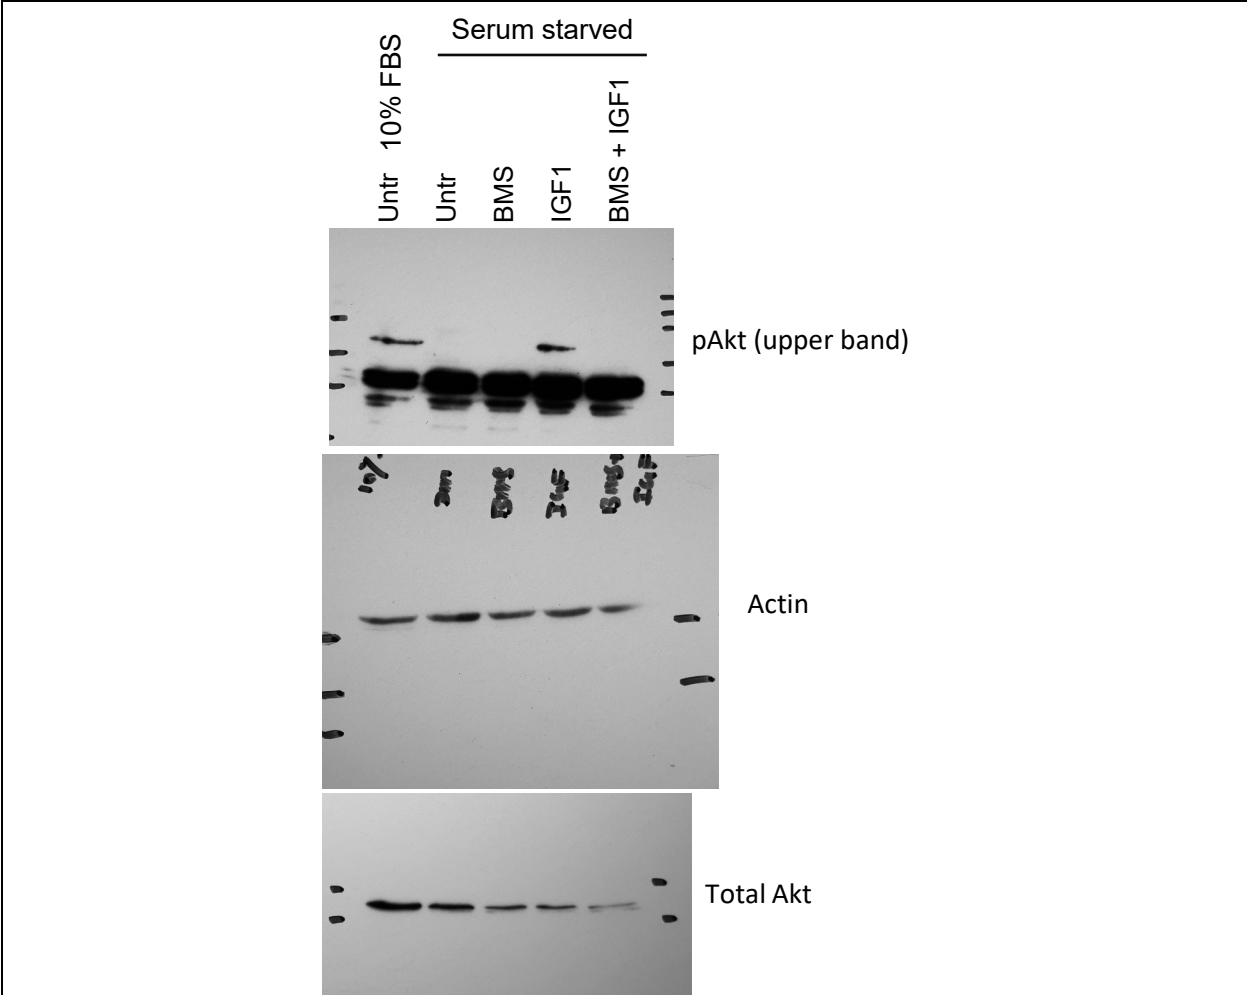

Supplemental Figure 3. Replicate experiment to accompany figure 4D. HT1080 cells were serum starved for 24 hours and then treated with IGF1 (100ng/ml) BMS (1 $\mu$ M) or both as indicated. Twenty four hours later, cell lysates were analyze by western blotting using antibodies against phospho-AKT, total AKT or Actin as a loading control. Note: this experiment does not appear in the main manuscript.

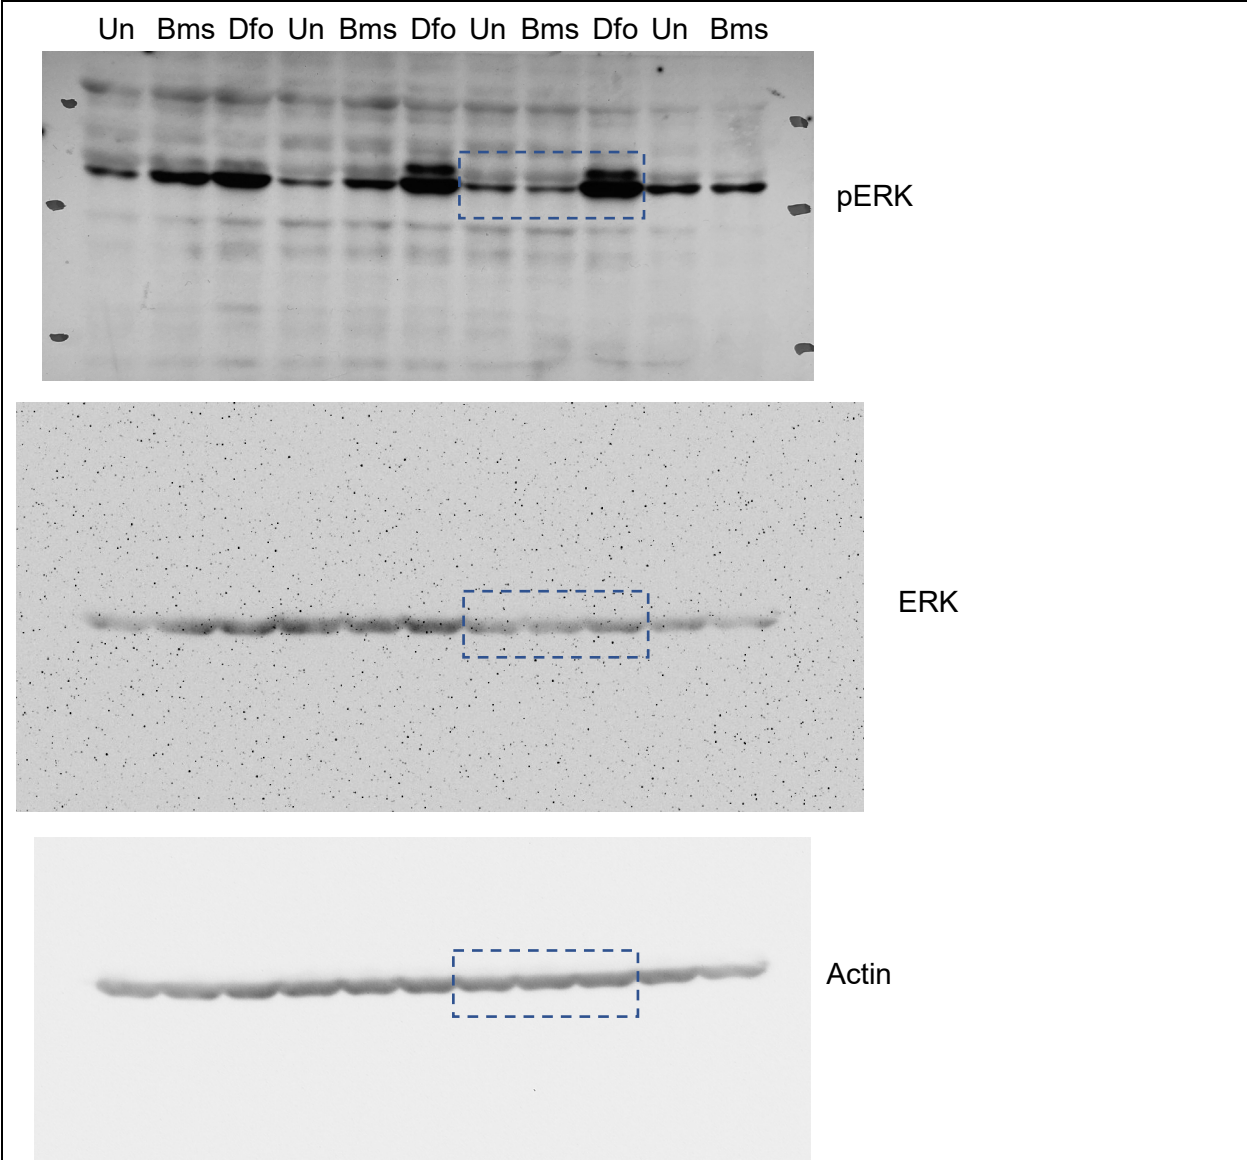

Supplemental Figure 4. Replicate uncropped experiment to accompany figure 4E. All replicates used for quantification in figure 4 are shown. Experimental details are as described in the legend to figure 4.

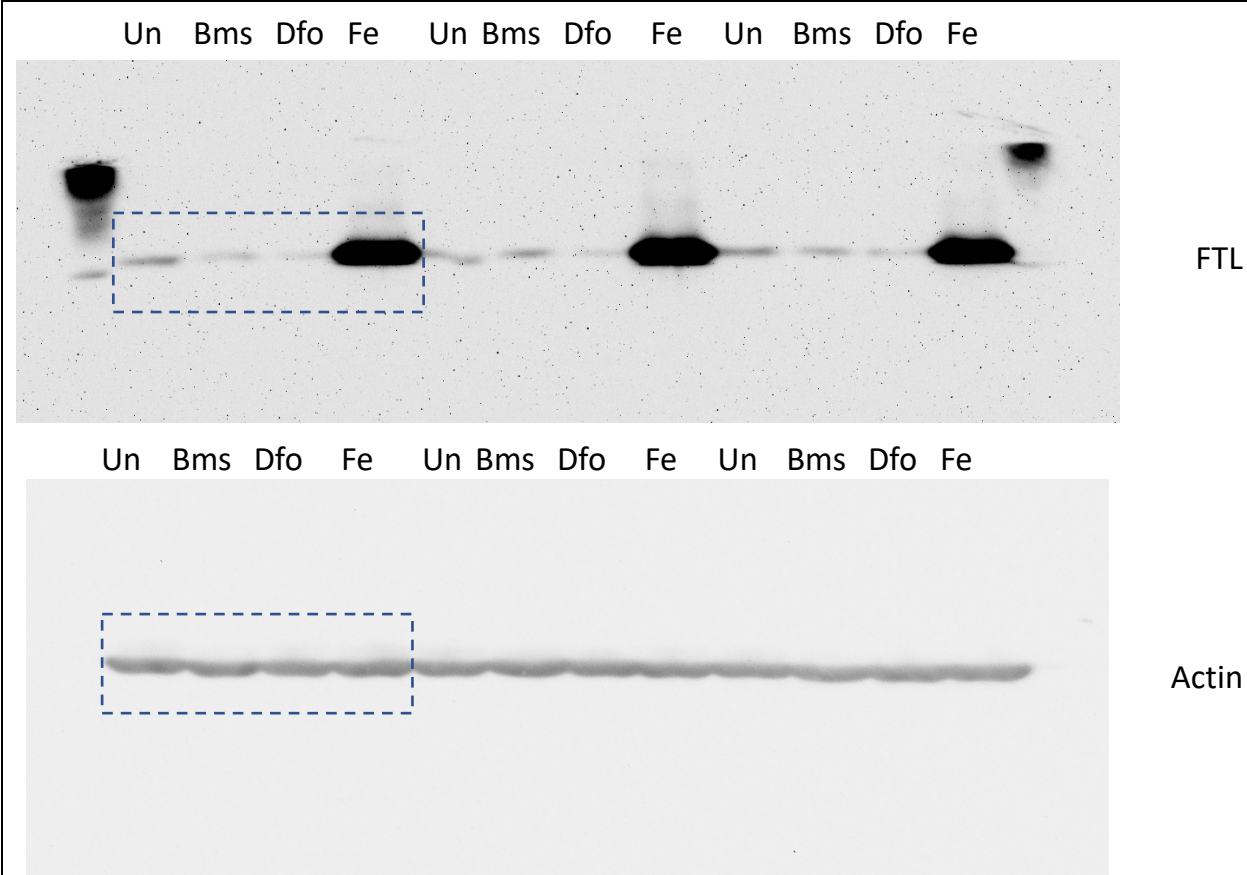

Supplemental Figure 5. Replicate uncropped experiment to accompany figure 8C. All replicates used for quantification in figure 8 are shown. Experimental details are as described in the legend to figure 8.
